# Supplementary material
Source: publisher figshare collection journal article supplement (https://tandf.figshare.com/ndownloader/files/17907830)
Supplement: Supplementary file 1 [file 17907830]

Degradation of Organophosphorus Flame Retardant Tri(chloro-propyl)phosphate (TCPP) by (001) Crystal Plane of TiO2 Photocatalysts

Huan He[+]1, Xiaohan Wang[+]1, Chen Cheng2,3, Shaogui Yang1*,Xiaomen Wang3, Qing Liu3, Yong Wang4*, Zunyao Wang3，Limin Zhang1, Cheng Sun3

*1 School of Environment, Nanjing Normal University, Nanjing, Jiangsu 210023, P.R. China*

*2 School of Chemistry and Life Science, Chengdu Normal University，Chengdu 611130, China*

*3 State Key Laboratory of Pollution Control and Resources Reuse, School of the Environment, Nanjing University, Nanjing, Jiangsu 210023, P.R. China*

*4School of Environment, Northeast Normal University, Changchun, Jilin 130024, P.R. China*

[+] *These authors contributed equally to this work.*

**** Corresponding author:***

1. mail: yangsg@njnu.edu.cn (S.G. Yang) , wangy833@nenu.edu.cn

**
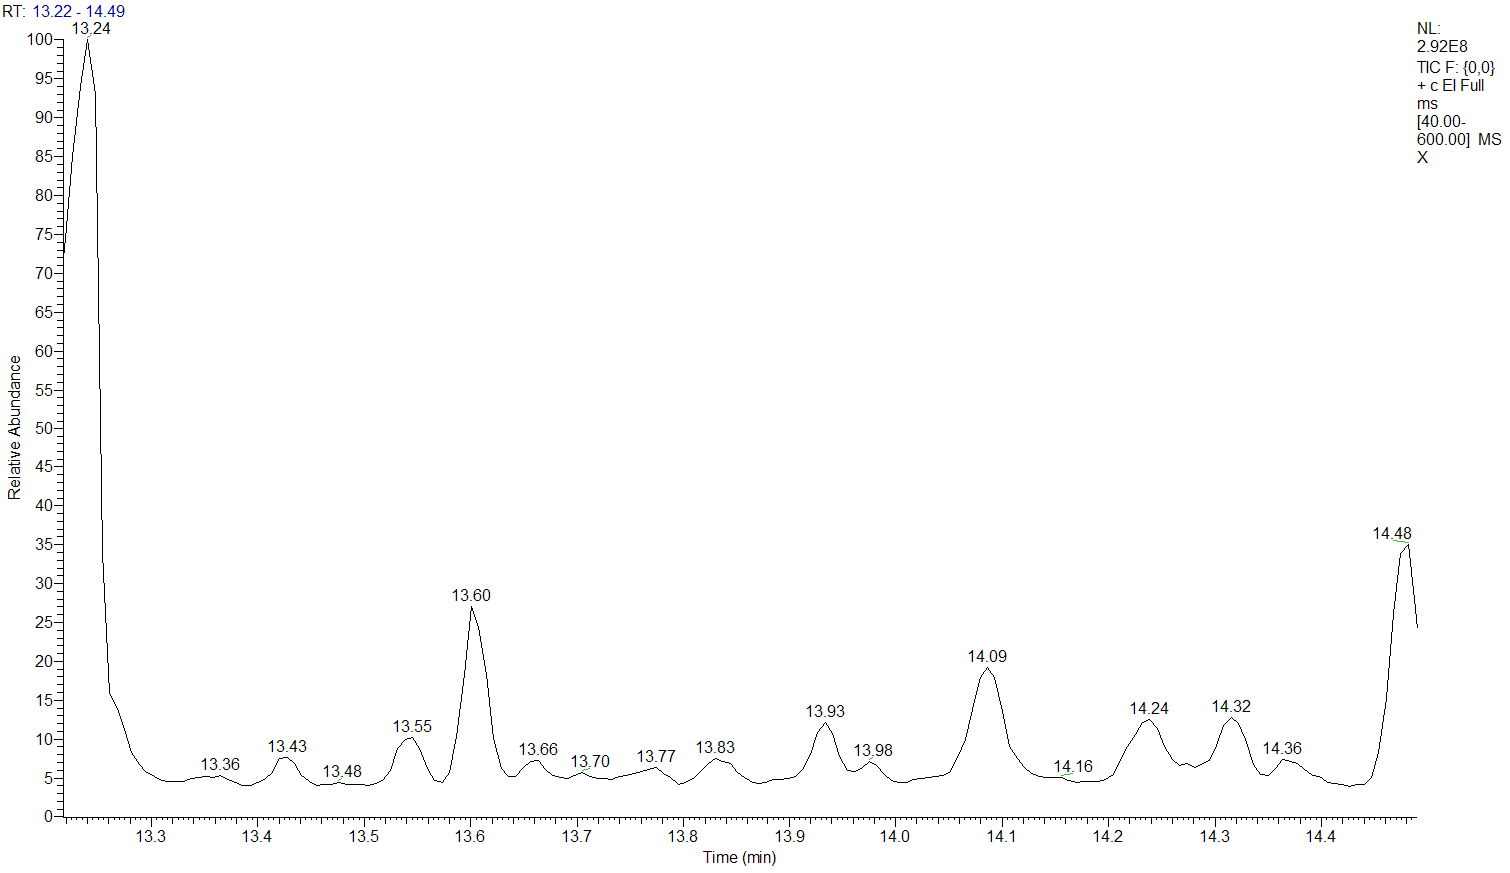
**

**
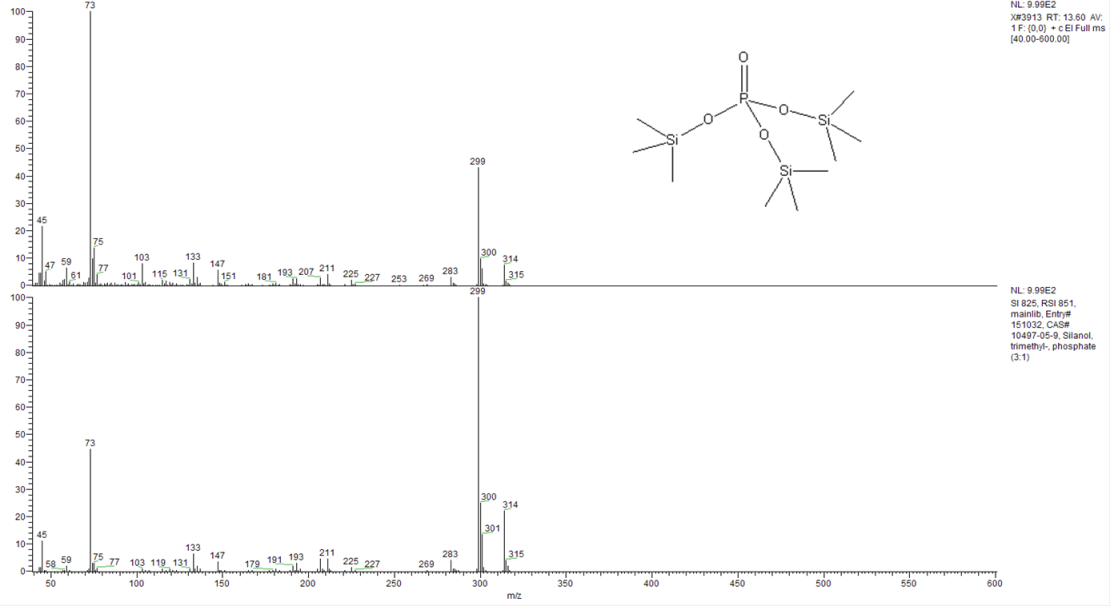
**

Fig.S1. Chromatogram and Mass spectra of PO34- comparing with the standard spectrum


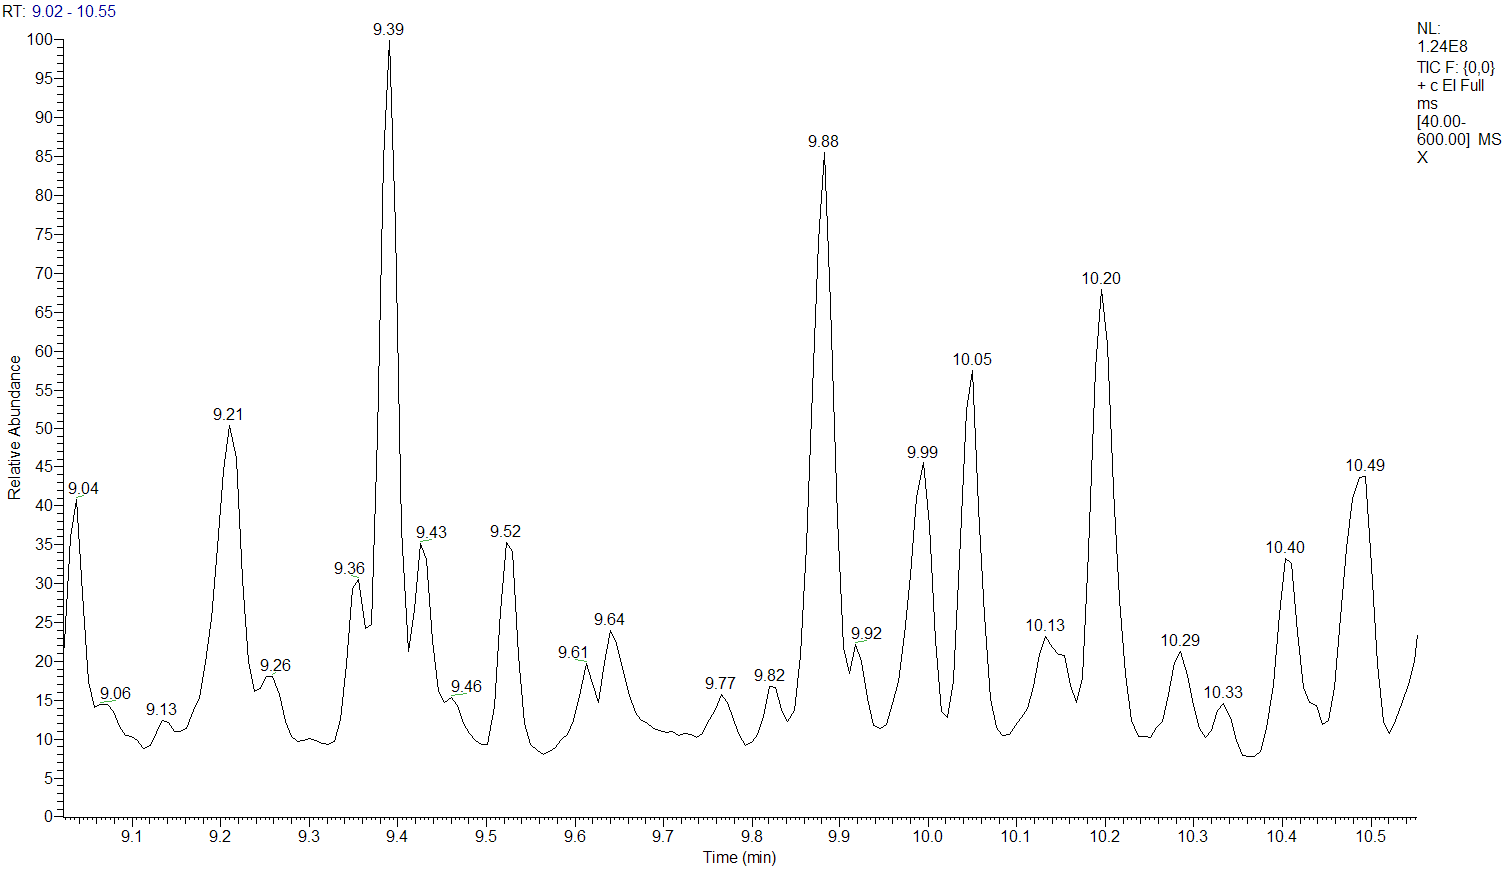
**
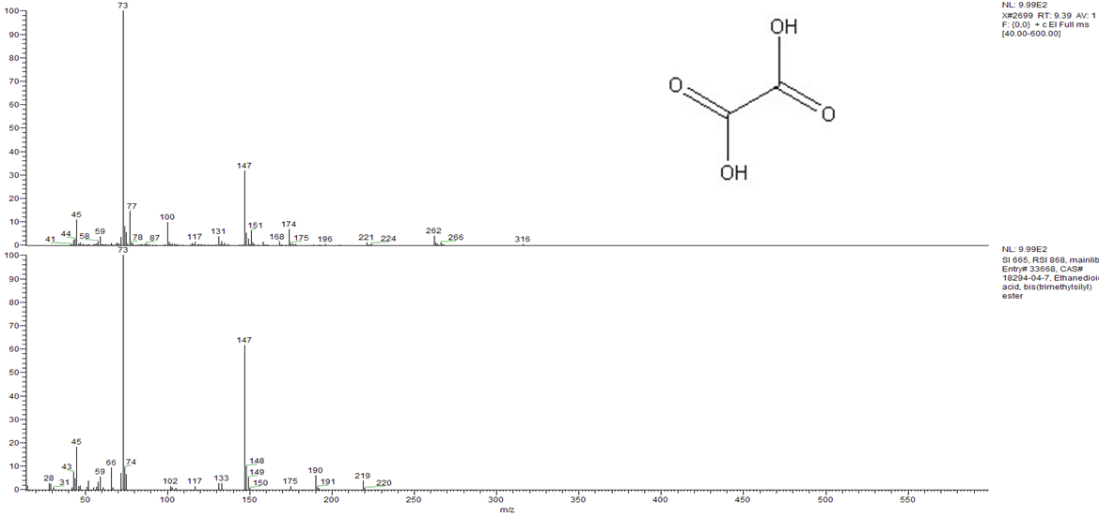
**

Fig.S2. Chromatogram and Mass spectra of （COOH）2 comparing with the standard spectrum
